# Supplementary material for: The Development of a CRISPR-FnCpf1 System for Large-Fragment Deletion and Multiplex Gene Editing in Acinetobacter baumannii
Source: Curr Issues Mol Biol. 2024 Jan 5;46(1):570–84. doi: 10.3390/cimb46010037 (PMC10814444; doi:10.3390/cimb46010037)
Supplement: Supplementary file 1 [file cimb-46-00037-s001.zip]

Archive with 8 entries (8 files):
- cimb-2797633-supplementary.pdf
- Figure S1.jpg
- Figure S2.jpg
- Figure S3.jpg
- Figure S4.jpg
- Figure S5.jpg
- Table S1.xlsx
- Table S2.xlsx
