# Supplementary material for: The Development of a CRISPR-FnCpf1 System for Large-Fragment Deletion and Multiplex Gene Editing in Acinetobacter baumannii
Source: Curr Issues Mol Biol. 2024 Jan 5;46(1):570–84. doi: 10.3390/cimb46010037 (PMC10814444; doi:10.3390/cimb46010037)
Supplement: Supplementary file 1 [file cimb-46-00037-s001.zip › Table S1.xlsx]

## Sheet: Sheet1
Table S1. Plasmids used in this study
Name	Description	Reference
pKOBEG-rpsL-FnCpf1	Plasmid carrying bacterial FnCpf1 gene.	Lab Stock
pET-tac-Cas9	Plasmid carrying tac promoter and sacB gene.	Lab Stock
pET-tac-FnCpf1	Plasmid carrying tac promoter, FnCpf1 gene, and sacB gene.	This Study
pAT04-apr	Broad-host-range plasmid carrying RecAb genes and apramycin resistance gene.	[17]
pFnCpfAb-apr	Broad-host-range plasmid expressing IPTG-inducible FnCpf1 and RecAb recombination proteins in A. baumannii.	This Study
pSGAb-km	Shuttle plasmid carrying sgRNA gene and kanamycin resistance gene.	[5]
pSGAb-spe	Shuttle plasmid carrying sgRNA gene and spectinomycin resistance gene.	[5]
pCrAb-km	Shuttle plasmid carrying kanamycin resistance gene and expressing crRNA in A. baumannii.	This Study
pCrAb-spe	Shuttle plasmid carrying spectinomycin resistance gene and expressing crRNA in A. baumannii.	This Study
pCrAb-km-pilT_1	pCrAb-km derivative with pilT_1 spacer	This Study
pCrAb-spe-pilT_1	pCrAb-spe derivative with pilT_1 spacer	This Study
pCrAb-km-pilT_2	pCrAb-km derivative with pilT_2 spacer	This Study
pCrAb-km-pmrB	pCrAb-km derivative with pmrB spacer	This Study
pCrAb-spe-pmrB	pCrAb-spe derivative with pmrB spacer	This Study
pCrAb-km-oxyR-GTTG	pCrAb-km derivative with oxyR spacer with GTTG PAM	This Study
pCrAb-km-oxyR-TTTA	pCrAb-km derivative with oxyR spacer with TTTA PAM	This Study
pCrAb-km-oxyR-GCTG	pCrAb-km derivative with oxyR spacer with GCTG PAM	This Study
pCrAb-km-oxyR-CCTA	pCrAb-km derivative with oxyR spacer with CCTA PAM	This Study
pCrAb-km-oxyR-AGAA	pCrAb-km derivative with oxyR spacer with AGAA PAM	This Study
pCrAb-km-oxyR-ATTG	pCrAb-km derivative with oxyR spacer with ATTG PAM	This Study
pCrAb-km-oxyR-CCTT	pCrAb-km derivative with oxyR spacer with CCTT PAM	This Study
pCrAb-km-oxyR-CTTG	pCrAb-km derivative with oxyR spacer with CTTG PAM	This Study
pCrAb-km-oxyR-TTTT	pCrAb-km derivative with oxyR spacer with TTTT PAM	This Study
pCrAb-km-adeB-GCTG	pCrAb-km derivative with adeB spacer with GCTG PAM	This Study
pCrAb-km-adeB-CTTA	pCrAb-km derivative with adeB spacer with CTTA PAM	This Study
pCrAb-km-adeB-CAAA	pCrAb-km derivative with adeB spacer with CAAA PAM	This Study
pCrAb-km-adeB-GTTC	pCrAb-km derivative with adeB spacer with GTTC PAM	This Study
pCrAb-km-adeB-TTTT	pCrAb-km derivative with adeB spacer with TTTT PAM	This Study
pCrAb-km-adeB-ATTA	pCrAb-km derivative with adeB spacer with ATTA PAM	This Study
pCrAb-km-adeB-CCTT	pCrAb-km derivative with adeB spacer with CCTT PAM	This Study
pCrAb-km-adeB-TTTG	pCrAb-km derivative with adeB spacer with TTTG PAM	This Study
pCrAb-km-adeB-ACTT	pCrAb-km derivative with adeB spacer with ACTT PAM	This Study
pCrAb-km-oxyR-15nt	pCrAb-km derivative with oxyR 15 nt spacer	This Study
pCrAb-km-oxyR-17nt	pCrAb-km derivative with oxyR 17 nt spacer	This Study
pCrAb-km-oxyR-19nt	pCrAb-km derivative with oxyR 19 nt spacer	This Study
pCrAb-km-oxyR-20nt	pCrAb-km derivative with oxyR 20 nt spacer	This Study
pCrAb-km-oxyR-21nt	pCrAb-km derivative with oxyR 21 nt spacer	This Study
pCrAb-km-oxyR-22nt	pCrAb-km derivative with oxyR 22 nt spacer	This Study
pCrAb-km-oxyR-23nt	pCrAb-km derivative with oxyR 23 nt spacer	This Study
pCrAb-km-oxyR-25nt	pCrAb-km derivative with oxyR 25 nt spacer	This Study
pCrAb-km-oxyR-30nt	pCrAb-km derivative with oxyR 30 nt spacer	This Study
pCrAb-km-hscB-15nt	pCrAb-km derivative with hscB 15 nt spacer	This Study
pCrAb-km-hscB-17nt	pCrAb-km derivative with hscB 17 nt spacer	This Study
pCrAb-km-hscB-19nt	pCrAb-km derivative with hscB 19 nt spacer	This Study
pCrAb-km-hscB-20nt	pCrAb-km derivative with hscB 20 nt spacer	This Study
pCrAb-km-hscB-21nt	pCrAb-km derivative with hscB 21 nt spacer	This Study
pCrAb-km-hscB-22nt	pCrAb-km derivative with hscB 22 nt spacer	This Study
pCrAb-km-hscB-23nt	pCrAb-km derivative with hscB 23 nt spacer	This Study
pCrAb-km-hscB-25nt	pCrAb-km derivative with hscB 25 nt spacer	This Study
pCrAb-km-hscB-30nt	pCrAb-km derivative with hscB 30 nt spacer	This Study
pCrAb-km-pilT-b	pCrAb-km derivative with pilT (both) spacer	This Study
pSGAb-km-pilT-b	pSGAb-km derivative with pilT (both) spacer	This Study
pCrAb-km-oxyR-b	pCrAb-km derivative with oxyR (both) spacer	This Study
pSGAb-km-oxyR-b	pSGAb-km derivative with oxyR (both) spacer	This Study
pCrAb-km-pmrB-b	pCrAb-km derivative with pmrB (both) spacer	This Study
pSGAb-km-pmrB-b	pSGAb-km derivative with pmrB (both) spacer	This Study
pCrAb-km-12.2kb	pCrAb-km derivative with two spacers to delete 12.2 kb DNA fragment in ATCC 17978	This Study
pCrAb-km-12.2kb-HR	pCrAb-km derivative with two spacers and homologous arms to delete 12.2 kb DNA fragment in ATCC 17978	This Study
pCrAb-km-14.1kb	pCrAb-km derivative with two spacers to delete 14.1 kb DNA fragment in ATCC 17978	This Study
pCrAb-km-14.1kb-HR	pCrAb-km derivative with two spacers and homologous arms to delete 14.1 kb DNA fragment in ATCC 17978	This Study
pCrAb-spe-14.1kb	pCrAb-spe derivative with two spacers to delete 14.1 kb DNA fragment in ABH6	This Study
pCrAb-spe-14.1kb-HR	pCrAb-spe derivative with two spacers and homologous arms to delete 14.1 kb DNA fragment in ABH6	This Study
pCrAb-km-pilT-pmrB	pCrAb-km derivative with two spacers to delete both pilT and pmrB	This Study
pCrAb-km-pilT-pmrB-HR	pCrAb-km derivative with two spacers and homologous arms to delete both pilT and pmrB	This Study
