# Supplementary material for: The Development of a CRISPR-FnCpf1 System for Large-Fragment Deletion and Multiplex Gene Editing in Acinetobacter baumannii
Source: Curr Issues Mol Biol. 2024 Jan 5;46(1):570–84. doi: 10.3390/cimb46010037 (PMC10814444; doi:10.3390/cimb46010037)
Supplement: Supplementary file 1 [file cimb-46-00037-s001.zip › Table S2.xlsx]

## Sheet: Sheet1
Table S2. Primers and ssODN donors used in this study
Name	Seqeunce	Description
FnCpf1-ter-F1	caggaaacagaattcATGTCCATCTACCAAGAGTTTGTG	amplification of FnCpf1 coding fragment
FnCpf1-ter-R1	tgggcataaagttgcGCATGCCTGCAGGTCGAC	amplification of FnCpf1 coding fragment
pET-tac-F1	GCAACTTTATGCCCATGCAAC	amplification of pET-tac-Cas9 plasmid backbone
pET-tac-R1	GAATTCTGTTTCCTGTGTGAAATTG	amplification of pET-tac-Cas9 plasmid backbone
FnCpf1-sacB-F1	tgagacaataaccctggatccGGGCTTATCGACTGCAC	amplification of FnCpf1-sacB fragment
FnCpf1-sacB-R1	agctgcacatgaaccggatccGTGAATTGACGCGTATTGGGATGG	amplification of FnCpf1-sacB fragment
crRNA-F1	tgggcataaagttgcaagcttGACAGCTAGCTCAGTCCTAGGTATAATAC	amplification of synthesized crRNA expression cassete
crRNA-R1	tcccccgggctgcaggaattcGGTAGACCAGAAACAAAAAAACACC	amplification of synthesized crRNA expression cassete
SpeR-CDS-F1	taaacttggtctgacagttaTTTGCCGACTACCTTGGTGATC	amplification of spectinomycin resistance gene coding fragment
SpeR-CDS-R1	attgaaaaaggaagagtatgGGGGAAGCGGTGATCGCC	amplification of spectinomycin resistance gene coding fragment
CrAb-F1	CATACTCTTCCTTTTTCAATATTATTGAAG	amplification of pCrAb-km plasmid region outside kanamycin resistance gene
CrAb-R1	TAACTGTCAGACCAAGTTTACTCATATATACTT	amplification of pCrAb-km plasmid region outside kanamycin resistance gene
pilT-spc-F1	agatCCAGCCTTAGAACATAAAGATGT	pilT spacer for gene deletion in ATCC 17978 and ABH6
pilT-spc-R1	ggccACATCTTTATGTTCTAAGGCTGG	pilT spacer for gene deletion in ATCC 17978 and ABH6
pilT-spc-F2	agatCCAGCTCTAGAACATAAAGATGT	pilT spacer for gene deletion in ATCC 19606
pilT-spc-R2	ggccACATCTTTATGTTCTAGAGCTGG	pilT spacer for gene deletion in ATCC 19606
pilT-80nt-ssODN1	TTACAGAGCTACTCGCCTTCTCTGTGAAAAATGGCGCGTCCGTGGCATTGTACTGGTGACAGGACCAACAGGTTCGGGTA	80 nt ssODN donor template for pilT gene deletion in ATCC 17978
pilT-80nt-ssODN2	TTACAGAGCTACTCGCCTTCTCTGTGAAAAATGGCGCGTCCGTGGCATTGTACTGGTGACGGGGCCAACAGGTTCGGGTA	80 nt ssODN donor template for pilT gene deletion in ATCC 19606
pilT-80nt-ssODN3	TTACAGAGCTACTCGCCTTCTCTGTGAAAAATGGCGCGTCCGTGGCATTGTACTGGTGACAGGACCAACAGGTTCAGGTA	80 nt ssODN donor template for pilT gene deletion in ABH6
pilT-seq-F1	TCACGCAATCTTTCACTCGG	amplification and sequencing of pilT locus in ATCC 17978, ATCC 19606, and ABH6
pilT-seq-R1	CGGCAGGGAATACGTCAATC	amplification of pilT locus in ATCC 17978, ATCC 19606, and ABH6
pmrB-spc-F1	agatCCGATGCTGCTCATGAATTACGA	pmrB spacer for gene deletion in ATCC 17978, ATCC 19606, and ABH6
pmrB-spc-R1	ggccTCGTAATTCATGAGCAGCATCGG	pmrB spacer for gene deletion in ATCC 17978, ATCC 19606, and ABH6
pmrB-80nt-ssODN	ATTTGCCTTAGCAGCCATTATTCGTCGTGGTTTAAAACCATGTGGCATTAAATTGTGTGGAGCAGTTGGTCAACTTGGCT	80 nt ssODN donor template for pmrB gene deletion in ATCC 17978, ATCC 19606, and ABH6
pmrB-seq-F1	TTAGCGGAAAGAACAGCTGA	amplification and sequencing of pmrB locus in ATCC 17978, ATCC 19606, and ABH6
pmrB-seq-R1	ACTTCCCACCTCAAGATGGT	amplification of pmrB locus in ATCC 17978, ATCC 19606, and ABH6
oxyR-GTTG-F1	agatCATTTACATGAAGCTCAAAGT	oxyR spacer with GTTG PAM
oxyR-GTTG-R1	ggccACTTTGAGCTTCATGTAAATG	oxyR spacer with GTTG PAM
oxyR-TTTA-F1	agatCATGAAGCTCAAAGTGAGAAG	oxyR spacer with TTTA PAM
oxyR-TTTA-R1	ggccCTTCTCACTTTGAGCTTCATG	oxyR spacer with TTTA PAM
oxyR-GCTC-F1	agatAAAGTGAGAAGATTGTAGAGC	oxyR spacer with GCTC PAM
oxyR-GCTC-R1	ggccGCTCTACAATCTTCTCACTTT	oxyR spacer with GCTC PAM
oxyR-CCTA-F1	agatGAACATGGTAATTTGGACATG	oxyR spacer with CCTA PAM
oxyR-CCTA-R1	ggccCATGTCCAAATTACCATGTTC	oxyR spacer with CCTA PAM
oxyR-AGAA-F1	agatCATGGTAATTTGGACATGATT	oxyR spacer with AGAA PAM
oxyR-AGAA-R1	ggccAATCATGTCCAAATTACCATG	oxyR spacer with AGAA PAM
oxyR-ATTG-F1	agatTCCTTGCCCTACCTTTTGACA	oxyR spacer with ATTG PAM
oxyR-ATTG-R1	ggccTGTCAAAAGGTAGGGCAAGGA	oxyR spacer with ATTG PAM
oxyR-CCTT-F1	agatGCCCTACCTTTTGACACAAGA	oxyR spacer with CCTT PAM
oxyR-CCTT-R1	ggccTCTTGTGTCAAAAGGTAGGGC	oxyR spacer with CCTT PAM
oxyR-CTTG-F1	agatCCCTACCTTTTGACACAAGAA	oxyR spacer with CTTG PAM
oxyR-CTTG-R1	ggccTTCTTGTGTCAAAAGGTAGGG	oxyR spacer with CTTG PAM
oxyR-TTTT-F1	agatGACACAAGAAGTTTAAAAGTA	oxyR spacer with TTTT PAM
oxyR-TTTT-R1	ggccTACTTTTAAACTTCTTGTGTC	oxyR spacer with TTTT PAM
oxyR-80nt-ssODN	AAGCCGTGAAATGAGTGAACCATTAACTGGTGATCTTCATAAATGCACTTCAAGCAAATTCACTTGATGATCTCGATTTA	80 nt ssODN donor template for oxyR gene deletion in ATCC 17978
adeB-GCTG-F1	agatCTTAAAATCATCAAACATACA	adeB spacer with GCTG PAM
adeB-GCTG-R1	ggccTGTATGTTTGATGATTTTAAG	adeB spacer with GCTG PAM
adeB-CTTA-F1	agatAAATCATCAAACATACAGTTC	adeB spacer with CTTA PAM
adeB-CTTA-R1	ggccGAACTGTATGTTTGATGATTT	adeB spacer with CTTA PAM
adeB-CAAA-F1	agatCATACAGTTCCAATGATGGTG	adeB spacer with CAAA PAM
adeB-CAAA-R1	ggccCACCATCATTGGAACTGTATG	adeB spacer with CAAA PAM
adeB-GTTC-F1	agatCAATGATGGTGATCTTTTTAG	adeB spacer with GTTC PAM
adeB-GTTC-R1	ggccCTAAAAAGATCACCATCATTG	adeB spacer with GTTC PAM
adeB-TTTT-F1	agatAGTAATTACCGGTATTACCTT	adeB spacer with TTTT PAM
adeB-TTTT-R1	ggccAAGGTAATACCGGTAATTACT	adeB spacer with TTTT PAM
adeB-ATTA-F1	agatCCGGTATTACCTTTGCCGGAA	adeB spacer with ATTA PAM
adeB-ATTA-R1	ggccTTCCGGCAAAGGTAATACCGG	adeB spacer with ATTA PAM
adeB-CCTT-F1	agatTGCCGGAATGAAATATTGGCC	adeB spacer with CCTT PAM
adeB-CCTT-R1	ggccGGCCAATATTTCATTCCGGCA	adeB spacer with CCTT PAM
adeB-TTTG-F1	agatCCGGAATGAAATATTGGCCAA	adeB spacer with TTTG PAM
adeB-TTTG-R1	ggccTTGGCCAATATTTCATTCCGG	adeB spacer with TTTG PAM
adeB-ACTT-F1	agatCGTTCCAGCTACCTTCAGATG	adeB spacer with ACTT PAM
adeB-ACTT-R1	ggccCATCTGAAGGTAGCTGGAACG	adeB spacer with ACTT PAM
adeB-80nt-ssODN	GACCATGTCGGTATCTATTTTATTTTCAGCGCTATTGGCATGAAAATAATTTGAAAGATAATCCCGATGTAAAAAGTAAT	80 nt ssODN donor template for adeB gene deletion in ATCC 17978
oxyR-spc15-F1	agatGAACATGGTAATTTG	oxyR 15 nt spacer
oxyR-spc15-R1	ggccCAAATTACCATGTTC	oxyR 15 nt spacer
oxyR-spc17-F1	agatGAACATGGTAATTTGGA	oxyR 17 nt spacer
oxyR-spc17-R1	ggccTCCAAATTACCATGTTC	oxyR 17 nt spacer
oxyR-spc19-F1	agatGAACATGGTAATTTGGACA	oxyR 19 nt spacer
oxyR-spc19-R1	ggccTGTCCAAATTACCATGTTC	oxyR 19 nt spacer
oxyR-spc20-F1	agatGAACATGGTAATTTGGACAT	oxyR 20 nt spacer
oxyR-spc20-R1	ggccATGTCCAAATTACCATGTTC	oxyR 20 nt spacer
oxyR-spc21-F1	agatGAACATGGTAATTTGGACATG	oxyR 21 nt spacer
oxyR-spc21-R1	ggccCATGTCCAAATTACCATGTTC	oxyR 21 nt spacer
oxyR-spc22-F1	agatGAACATGGTAATTTGGACATGA	oxyR 22 nt spacer
oxyR-spc22-R1	ggccTCATGTCCAAATTACCATGTTC	oxyR 22 nt spacer
oxyR-spc23-F1	agatGAACATGGTAATTTGGACATGAT	oxyR 23 nt spacer
oxyR-spc23-R1	ggccATCATGTCCAAATTACCATGTTC	oxyR 23 nt spacer
oxyR-spc25-F1	agatGAACATGGTAATTTGGACATGATTG	oxyR 25 nt spacer
oxyR-spc25-R1	ggccCAATCATGTCCAAATTACCATGTTC	oxyR 25 nt spacer
oxyR-spc30-F1	agatGAACATGGTAATTTGGACATGATTGTCCTT	oxyR 30 nt spacer
oxyR-spc30-R1	ggccAAGGACAATCATGTCCAAATTACCATGTTC	oxyR 30 nt spacer
hscB-spc15-F1	agatTACAATCCGCTTTAG	hscB 15 nt spacer
hscB-spc15-R1	ggccCTAAAGCGGATTGTA	hscB 15 nt spacer
hscB-spc17-F1	agatTACAATCCGCTTTAGAA	hscB 17 nt spacer
hscB-spc17-R1	ggccTTCTAAAGCGGATTGTA	hscB 17 nt spacer
hscB-spc19-F1	agatTACAATCCGCTTTAGAACT	hscB 19 nt spacer
hscB-spc19-R1	ggccAGTTCTAAAGCGGATTGTA	hscB 19 nt spacer
hscB-spc20-F1	agatTACAATCCGCTTTAGAACTT	hscB 20 nt spacer
hscB-spc20-R1	ggccAAGTTCTAAAGCGGATTGTA	hscB 20 nt spacer
hscB-spc21-F1	agatTACAATCCGCTTTAGAACTTC	hscB 21 nt spacer
hscB-spc21-R1	ggccGAAGTTCTAAAGCGGATTGTA	hscB 21 nt spacer
hscB-spc22-F1	agatTACAATCCGCTTTAGAACTTCG	hscB 22 nt spacer
hscB-spc22-R1	ggccCGAAGTTCTAAAGCGGATTGTA	hscB 22 nt spacer
hscB-spc23-F1	agatTACAATCCGCTTTAGAACTTCGT	hscB 23 nt spacer
hscB-spc23-R1	ggccACGAAGTTCTAAAGCGGATTGTA	hscB 23 nt spacer
hscB-spc25-F1	agatTACAATCCGCTTTAGAACTTCGTGA	hscB 25 nt spacer
hscB-spc25-R1	ggccTCACGAAGTTCTAAAGCGGATTGTA	hscB 25 nt spacer
hscB-spc30-F1	agatTACAATCCGCTTTAGAACTTCGTGAACAAC	hscB 30 nt spacer
hscB-spc30-R1	ggccGTTGTTCACGAAGTTCTAAAGCGGATTGTA	hscB 30 nt spacer
pilT-Cpf-F1	agatACACGGAAACGCGCAACATT	pilT spacer for both FnCpf1 and SpCas9
pilT-Cpf-R1	ggccAATGTTGCGCGTTTCCGTGT	pilT spacer for both FnCpf1 and SpCas9
pilT-Cas-F1	tagtACACGGAAACGCGCAACATT	pilT spacer for both FnCpf1 and SpCas9
pilT-Cas-R1	aaacAATGTTGCGCGTTTCCGTGT	pilT spacer for both FnCpf1 and SpCas9
oxyR-Cpf-F1	agatATCGGGCGGCATTATGGAGC	oxyR spacer for both FnCpf1 and SpCas9
oxyR-Cpf-R1	ggccGCTCCATAATGCCGCCCGAT	oxyR spacer for both FnCpf1 and SpCas9
oxyR-Cas-F1	tagtATCGGGCGGCATTATGGAGC	oxyR spacer for both FnCpf1 and SpCas9
oxyR-Cas-R1	aaacGCTCCATAATGCCGCCCGAT	oxyR spacer for both FnCpf1 and SpCas9
pmrB-Cpf-F1	agatGTCTCATCATTTACATTTGC	pmrB spacer for both FnCpf1 and SpCas9
pmrB-Cpf-R1	ggccGCAAATGTAAATGATGAGAC	pmrB spacer for both FnCpf1 and SpCas9
pmrB-Cas-F1	tagtGTCTCATCATTTACATTTGC	pmrB spacer for both FnCpf1 and SpCas9
pmrB-Cas-R1	aaacGCAAATGTAAATGATGAGAC	pmrB spacer for both FnCpf1 and SpCas9
12.2kb-spc-F1	agatCCATTATTGGTGCGGGGCCGAATTTCTACTGTTGTAGATAGACACAAAAACAGCATTAC	double spacers for 12.2 kb DNA fragment deletion in ATCC 17978
12.2kb-spc-R1	ggccGTAATGCTGTTTTTGTGTCTATCTACAACAGTAGAAATTCGGCCCCGCACCAATAATGG	double spacers for 12.2 kb DNA fragment deletion in ATCC 17978
12.2kb-80nt-ssODN	AACACTCGTTTTGATGAGTTTGCACCACTACAAGGGCAAACCGGATTGTGCATCAAGTGATTATTCCTGAGCTGCCTGAT	80 nt ssODN donor template for 12.2 kb DNA fragment deletion in ATCC 17978
12.2kb-UP-F1	gggggatccactagttctagaGGAGCAGGCAAAGGTAAACATG	amplification of upstream homologous arm for 12.2 kb DNA fragment deletion in ATCC 17978
12.2kb-UP-R1	acaatccggTTTGCCCTTGTAGTGGTGCAA	amplification of upstream homologous arm for 12.2 kb DNA fragment deletion in ATCC 17978
12.2kb-DN-F1	acaagggcaaaCCGGATTGTGCATCAAGTGAT	amplification of downstream homologous arm for 12.2 kb DNA fragment deletion in ATCC 17978
12.2kb-DN-R1	cgcggtggcggccgctctagaTAAGTGGAAGCGATGGTGCAC	amplification of downstream homologous arm for 12.2 kb DNA fragment deletion in ATCC 17978
12.2kb-seq-F1	ATGCAGATTCGTCAATTTCAA	amplification and sequencing of 12.2 kb deletion locus in ATCC 17978
12.2kb-seq-R1	GATGACGATACATTTGCGATTT	amplification of 12.2 kb deletion locus in ATCC 17978
14.1kb-spc-F1	agatACTTGATCGTGACAAGTTAAAATTTCTACTGTTGTAGATTACGAGGCAATAAGGCTATT	double spacers for 14.1 kb DNA fragment deletion in ATCC 17978 and ABH6
14.1kb-spc-R1	ggccAATAGCCTTATTGCCTCGTAATCTACAACAGTAGAAATTTTAACTTGTCACGATCAAGT	double spacers for 14.1 kb DNA fragment deletion in ATCC 17978 and ABH6
14.1kb-UP-F1	gggggatccactagttctagaGGTTGATCGGCTCGGTTTTG	amplification of upstream homologous arm for 14.1 kb DNA fragment deletion in ATCC 17978 and ABH6
14.1kb-UP-R1	ataaagtccgctgagtgaGCCAGTTACGCCACTGACTAAGA	amplification of upstream homologous arm for 14.1 kb DNA fragment deletion in ATCC 17978 and ABH6
14.1kb-DN-F1	agtggcgtaactggcCACTCCGCGGACCTTATTG	amplification of downstream homologous arm for 14.1 kb DNA fragment deletion in ATCC 17978
14.1kb-DN-R1	cgcggtggcggccgctctagaCTATAATTATAGATATAACTTTTAAAATGATACTGCT	amplification of downstream homologous arm for 14.1 kb DNA fragment deletion in ATCC 17978
14.1kb-DN-F2	agtggcgtaactggcCACTCAGCGGACTTTATTGTCTT	amplification of downstream homologous arm for 14.1 kb DNA fragment deletion in ABH6
14.1kb-DN-R2	cgcggtggcggccgctctagaCTATAATTGTAGATATAACTTTTAAAATGATACTGC	amplification of downstream homologous arm for 14.1 kb DNA fragment deletion in ABH6
14.1kb-seq-F1	GCCTGTTTACCACGATATGG	amplification and sequencing of 14.1 kb deletion locus in ATCC 17978 and ABH6
14.1kb-seq-R1	CAATGACTCTGCTGTAAACATAGG	amplification and sequencing of 14.1 kb deletion locus in ATCC 17978 and ABH6
pilT-pmrB-spc-F1	agatCCAGCCTTAGAACATAAAGAAATTTCTACTGTTGTAGATCCGATGCTGCTCATGAATTA	double spacers for both pilT and pmrB deletion in ATCC 17978
pilT-pmrB-spc-R1	ggccTAATTCATGAGCAGCATCGGATCTACAACAGTAGAAATTTCTTTATGTTCTAAGGCTGG	double spacers for both pilT and pmrB deletion in ATCC 17978
pilT-pmrB-UP-F1	gggggatccactagttctagaATGAGTTTTTGATACGGCTAAAAGTT	amplification of upstream homologous arm for pilT deletion in ATCC 17978
pilT-pmrB-UP-R1	GACGCGCCATTTTTCACAGA	amplification of upstream homologous arm for pilT deletion in ATCC 17978
pilT-pmrB-DN-F1	tctgtgaaaaatggcgcgtcCGTGGCATTGTACTGGTGACAG	amplification of downstream homologous arm for pilT deletion in ATCC 17978
pilT-pmrB-DN-R1	taaagggtgcACACGGTCAATGGTTTTTGCTG	amplification of downstream homologous arm for pilT deletion in ATCC 17978
pilT-pmrB-UP-F2	ttgaccgtgtGCACCCTTTAAAAACTGTAAGCAG	amplification of upstream homologous arm for pmrB deletion in ATCC 17978
pilT-pmrB-UP-R2	gccacaTGGTTTTAAACCACGACGAATAAT	amplification of upstream homologous arm for pmrB deletion in ATCC 17978
pilT-pmrB-DN-F2	gtggtttaaaaccaTGTGGCATTAAATTGTGTGGAGC	amplification of downstream homologous arm for pmrB deletion in ATCC 17978
pilT-pmrB-DN-R2	cgcggtggcggccgctctagaGATGCACGCGATAAAAACGC	amplification of downstream homologous arm for pmrB deletion in ATCC 17978
